# Supplementary material for: Fever enhances host bacterial defense while limiting mitochondrial damage
Source: Research Square preprint supplement (doi:10.21203/rs.3.rs-8724408/v1), 2026-02-06
Supplement: Supplementary file 1 [file 89f91631582536a0d7cf9d48.pdf]

# **Fever enhances host bacterial defence while limiting mitochondrial damage**

Yonghan Wu, Elijah Rowe, Albert Siryaporn, Steven P. Gross

Corresponding author: [asirya@uci.edu](mailto:asirya@uci.edu) or [sgross@uci.edu](mailto:sgross@uci.edu).

Extended Data Figures 1-2

Extended Data Tables 1-3

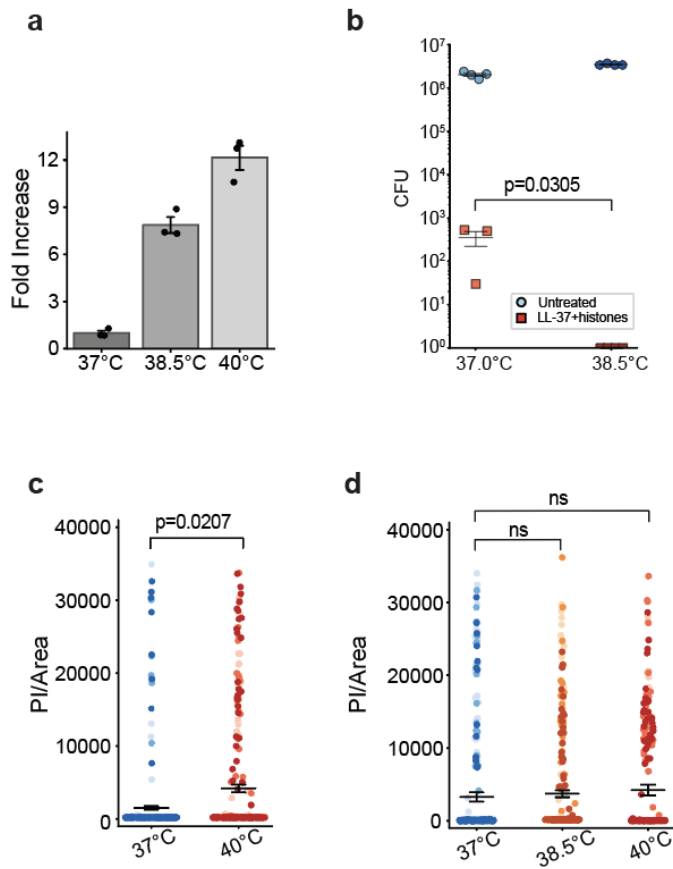

**Extended Data Fig. 1 | Quantification of propidium iodide (PI) intensity and CFU at different treatments. (a)** Fold increase of PI fluorescence of increasing temperature in dual treated 5  $\mu\text{g ml}^{-1}$  histones and 10  $\mu\text{g ml}^{-1}$  LL-37 normalized by 37°C. **(b)** CFUs performed at indicated temperatures for 5  $\mu\text{g ml}^{-1}$  whole histone and 20  $\mu\text{g ml}^{-1}$  LL-37 dual treatment for 4 h. **(c)** PI quantification for *E. coli* MG1655 treated with 5  $\mu\text{g ml}^{-1}$  histones and 5  $\mu\text{g ml}^{-1}$  LL-37, **(d)** and 20  $\mu\text{g ml}^{-1}$  LL-37 alone at indicated temperatures. Black bar indicated the mean and error bars represented SEM from three replicates. P-values greater than 0.05 are denoted as non-significant (ns)

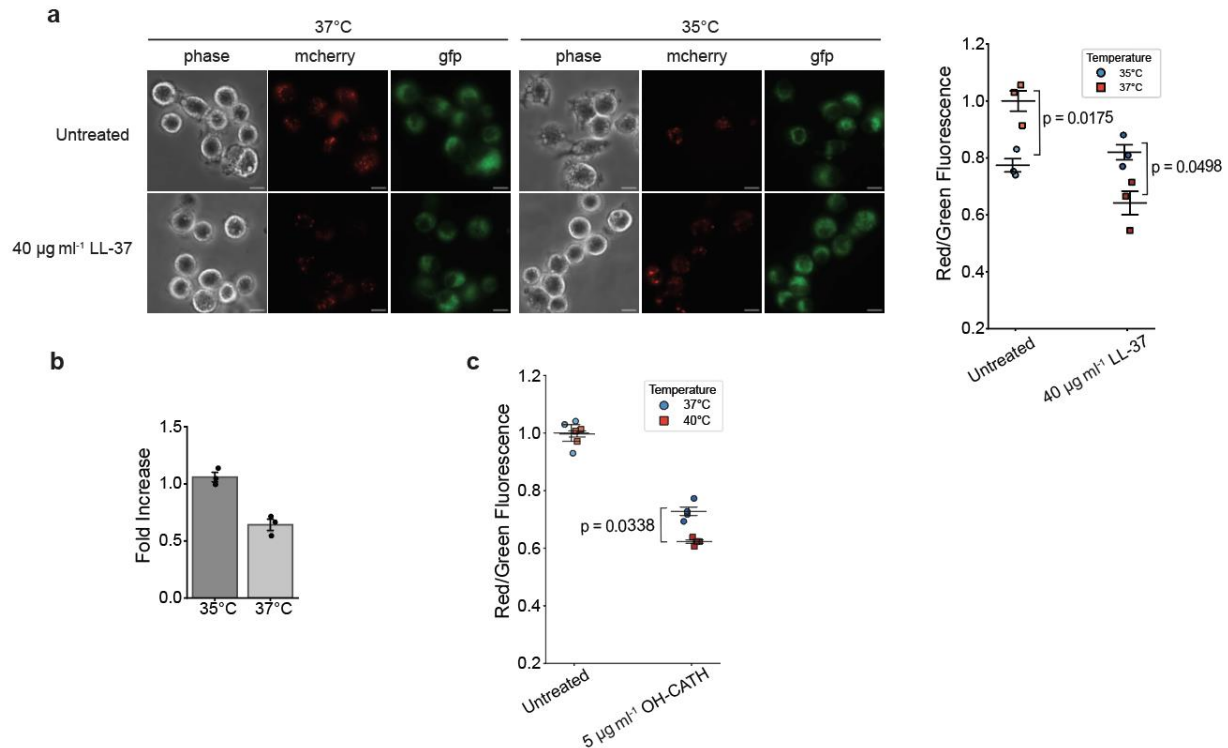

**Extended Data Fig. 2 | Representative fluorescence microscopy images and quantification of JC-1 red/green fluorescence ratio under different treatments. (a)** Representative fluorescence microscopy images of J774.1 macrophages with treatment of 40 µg ml<sup>-1</sup> LL-37 at 37°C and 35°C and quantification of JC-1 red/green fluorescence ratio. Scale bar = 10 µm. **(b)** Fold changes of mitochondrial activity for 40 µg ml<sup>-1</sup> LL-37 normalized by untreated at 35°C and 37°C. **(c)** Quantification of JC-1 red/green fluorescence ratio of 5 µg ml<sup>-1</sup> OH-CATH treated J774.1 for 1 h at 37°C and 40°C. Black bar indicated the mean and error bars represented SEM from three replicates. P-values greater than 0.05 are denoted as non-significant (ns).

| Treatments                                                       | 37°C   | 40°C   |
|------------------------------------------------------------------|--------|--------|
| 5 $\mu\text{g ml}^{-1}$ LL-37                                    | 1.67%  | 4.67%  |
| 5 $\mu\text{g ml}^{-1}$ histones + 5 $\mu\text{g ml}^{-1}$ LL-37 | 5.33%  | 23.76% |
| 40 $\mu\text{g ml}^{-1}$ LL-37                                   | 33.65% | 66.67% |
| 10 $\mu\text{g ml}^{-1}$ H1 + 2 $\mu\text{g ml}^{-1}$ LL-37      | 1.33%  | 18.00% |
| 400 $\mu\text{g ml}^{-1}$ H1                                     | 14.67% | 15.00% |

**Extended Data Table 1 | Percentage of cells with PI entry treated by histones, LL-37, histone H1 or combined treatments at physiological or febrile temperature.**

| Treatments                                                    | 37°C   | 38.5°C | 40°C   |
|---------------------------------------------------------------|--------|--------|--------|
| 5 µg ml <sup>-1</sup> histones + 10 µg ml <sup>-1</sup> LL-37 | 3.03%  | 18.52% | 32.32% |
| 20 µg ml <sup>-1</sup> LL-37                                  | 17.69% | 23.67% | 28.90% |
| 100 µg ml <sup>-1</sup> histones                              | 34.67% | 40.33% | 57.33% |

**Extended Data Table 2 | Percentage of cells with PI entry treated by histones, LL-37, and combined treatment across febrile temperature range.**

| Treatments                           | 20°C   | 25°C   | 30°C   | 35°C   | 40°C   | 42°C   |
|--------------------------------------|--------|--------|--------|--------|--------|--------|
| 8 µg ml <sup>-1</sup> OH-CATH        | 60.00% | 32.00% | 46.67% | 56.58% | 66.67% | 62.67% |
| 0.5 µg ml <sup>-1</sup> Pelteobagrín | 60.00% | 84.67% | 56.00% | 41.33% | -      | -      |
| 40 µM Magainin-2                     | 64.33% | 54.73% | 42.18% | 29.00% | -      | -      |

**Extended Data Table 3 | Percentage of cells with PI entry following treatment by cold blood animals' peptides treatment under indicated temperatures.**
